# Supplementary material for: The Dual Benefit of Plant Essential Oils against Tuta absoluta
Source: MDPI journal article supplement (doi:10.3390/plants12050985), 2023-02-21
Supplement: s1 [file s1]

## The dual benefit of plant essential oils against *Tuta absoluta*

Saoussen Ben Abdallah<sup>1,2</sup>, Chaymaa Riahi<sup>2</sup>, Sandra Vacas<sup>3</sup>, Vicente Navarro-Llopis<sup>3</sup>, Alberto Urbaneja<sup>2</sup> and Meritxell Pérez-Hedo<sup>2#</sup>

<sup>1</sup>Southwest Florida Research and Education Center. 2685 FL-29, Immokalee, FL 34142, (USA)

<sup>2</sup>Instituto Valenciano de Investigaciones Agrarias (IVIA), Centro de Protección Vegetal y Biotecnología, CV-315, Km 10.7, 46113 Moncada, Valencia, Spain

<sup>3</sup>Centro de Ecología Química Agrícola – Instituto Agroforestal del Mediterráneo. Universitat Politècnica de València. Camino de Vera s/n, 46022 Valencia, Spain

## Supplementary materials, tables & figures

### Plant essential oils

The following PEOs were used [yarrow (*Achillea millefolium*, Asteraceae), garlic (*Allium sativum*, Amaryllidaceae), rosemary (*Rosmarinus officinalis*, Lamiaceae), marigold (*Tagetes minuta*, Asteraceae) and thyme (*Thymus zygis*, Lamiaceae)] (Supp. Table S1).

### Analysis of plant essential oil by gas chromatography–mass spectrometry

**GC-MS conditions.** The analyses of the PEO samples were performed by using a Clarus 690 GC coupled to a Clarus SQ 8T mass spectrometer (Perkin Elmer, Inc., Wellesley, PA, USA), equipped with a ZB-5MS fused-silica capillary column (30 m x 0.25 mm i.d. x 0.25 µm film thickness; Phenomenex Inc., Torrance, CA, USA). The injector was set at 250 °C and the oven was held at 60 °C for 5 min, raised at 3 °C/min up to 180 °C and then programmed at 20 °C/min to reach 280 °C, held for 10 min. Helium was used as the carrier gas with a flow of 1 ml/min. The detection was performed in the EI mode (70 eV) with the ionization source set at 200 °C. The spectrum acquisition was performed in full scan mode (mass range m/z 33–450) and chromatograms and spectra were recorded by means of GC-MS Turbomass software v. 6.1.2 (PerkinElmer Inc.). Compounds were identified by comparing their mass spectra with those of pure standards when available and, tentatively, based on high probability matches (> 80 %) according to the NIST MS Search routine (NIST Mass Spectral Search Program for the

NIST\EPA\NIH mass Spectral Library, version 2.4, build 3/2020). For each PEO, the chromatographic peak areas of all detected compounds were integrated and the proportion of each compound regarding the total chromatogram area was calculated.

**Essential oils composition.** The detailed chemical composition of the tested PEOs are shown in Tables S2-S6. The composition of *A. millefolium* consisted of 70 constituents, with sesquiterpene compounds making up 57 % and monoterpenoids 39 % as the major compounds (**Supp. Table S2**). *Allium sativum* was made up of 38 constituents, primarily sulfur compounds, including diallyl trisulfide (39.93 %), diallyl disulfide (15.97 %), allyl methyl trisulfide (14.06 %), and diallyl tetrasulfide (7.41 %) as the major compounds (**Supp. Table S3**). *Rosmarinus officinalis* was composed of 51 constituents, mostly monoterpenoids (91 %) as the major compounds (**Supp. Table S4**). *Tagetes minuta* was made up of 54 constituents, with the monoterpenes Z- $\beta$ -ocimene and dihydrotageton accounting for 63 % of the total chromatogram area (**Supp. Table S5**). *Thymus zygis* was composed of 56 constituents, primarily monoterpenoids (94 %) as the major compounds (**Supp. Table S6**).

### **The phytotoxic effect of PEOs on tomato plants**

The phytotoxic effect of the prepared concentrations (0.05%, 0.1%, 0.5%, 1%, and 2.5%) of each polyethylene oxide (PEO) was evaluated on tomato plants for two weeks, using the methodology described by **Campolo et al. (2017)**. The plants were sprayed with the five PEOs using a handheld sprayer until runoff (approximately 25 ml of each oil solution per plant). Plants treated only with 2% Tween served as control. The tomato plants were kept in a greenhouse at a temperature of  $22 \pm 3^{\circ}\text{C}$ , relative humidity of  $55 \pm 5\%$ , and a photoperiod of 14:10 hours approximately (L:D). The plants were fertilized once a week with a mineral fertilizer during the experiment. The effect of the PEOs on the phenotype of the tomato plants was evaluated every 3 days for two weeks by recording the number of damaged leaflets and the severity of the damage. The severity was categorized as follows: zero (no foliar burn and/or wilting with maintenance of green color), one (partially damaged leaf with up to 25% burn

and/or wilting), two (leaves with 25 to 50% burn and/or wilting), three (more than 50% dead leaves), and four (totally dead leaves). The phytotoxic index ( $P_i$ ) was calculated using the following formula.

$$P_i = \sum_{j=0}^n \left( \frac{DL_j}{TL} * \frac{DC}{n-1} \right)$$

Where  $j$  is the damaged severity class,  $DL$  is the number of damaged leaves for each damage severity class,  $TL$  is the total number of sprayed leaves.

The results revealed that the phytotoxic index ( $P_i$ ) increased significantly in a dose-dependent manner when tomato plants were sprayed with 0.1%, 0.5%, 1%, and 2.5% of all the tested oils (Supp. Figure 1).

In contrast, tomato plants sprayed with 0.05% of each oil showed little to no phytotoxic effect.

**Table S1.** Plant essential oils tested in this study.

| Essential oil trade name | Family         | Scientific name               | Plant extracted from | Extraction method  | Manufacturer                |
|--------------------------|----------------|-------------------------------|----------------------|--------------------|-----------------------------|
| Yarrow                   | Asteraceae     | <i>Achillea Millefolium</i>   | Aerial part          | Steam distillation | Eco Aurous (London, UK)     |
| Garlic                   | Amaryllidaceae | <i>Allium sativum</i>         | Bulb                 | Distillation       | Paranarom (Miami, FL)       |
| Rosemary                 | Lamiaceae      | <i>Rosmarinus officinalis</i> | Aerial part          | Distillation       | Essenciales (Barcelone, ES) |
| Marigold                 | Asteraceae     | <i>Tagetes minuta</i>         | Flower               | Distillation       | deve herbes (New delhi, IN) |
| Thyme                    | Lamiaceae      | <i>Thymus zygis</i>           | Aerial part          |                    | Aroma-Labs (Lyon, FR)       |

**Table S2.** Essential oil composition of *Achillea millefolium* identified by GC-MS.

| rt<br>(min) <sup>1</sup> | compound                                                                  | % TIC <sup>2</sup> |
|--------------------------|---------------------------------------------------------------------------|--------------------|
| 6.85                     | tricyclene                                                                | 0.27               |
| 6.98                     | 2-thujene                                                                 | 0.04               |
| <b>7.27</b>              | <b><math>\alpha</math>-pinene</b>                                         | <b>2.68</b>        |
| <b>7.91</b>              | <b>camphene</b>                                                           | <b>1.33</b>        |
| <b>8.85</b>              | <b>sabinene</b>                                                           | <b>1.26</b>        |
| <b>9.06</b>              | <b><math>\beta</math>-pinene</b>                                          | <b>4.68</b>        |
| 9.58                     | $\beta$ -myrcene                                                          | 0.05               |
| 10.30                    | $\alpha$ -phellandrene                                                    | 0.01               |
| 10.40                    | 3-carene                                                                  | 0.01               |
| 11.14                    | p-cymene                                                                  | 0.78               |
| <b>11.35</b>             | <b>limonene</b>                                                           | <b>1.01</b>        |
| <b>11.49</b>             | <b>eucalyptol</b>                                                         | <b>5.32</b>        |
| 12.18                    | trans- $\beta$ -ocimene                                                   | 0.01               |
| 12.70                    | $\gamma$ -terpinene                                                       | 0.42               |
| 13.96                    | terpinolene                                                               | 0.34               |
| 14.10                    | fenchone                                                                  | 0.01               |
| 14.91                    | $\alpha$ -campholenal                                                     | 0.32               |
| 15.33                    | 1.5.5-Trimethylbicyclo[2.2.1]heptan-2-ol                                  | 0.04               |
| <b>16.90</b>             | <b>camphor</b>                                                            | <b>16.11</b>       |
| <b>17.64</b>             | <b>exo-borneol</b>                                                        | <b>1.98</b>        |
| 18.04                    | endo-borneol                                                              | 0.18               |
| 19.15                    | $\alpha$ -terpineol                                                       | 0.95               |
| 19.37                    | $\gamma$ -terpineol                                                       | 0.11               |
| 23.31                    | bornyl acetate                                                            | 0.50               |
| 25.96                    | $\alpha$ -cubebene                                                        | 0.21               |
| 26.14                    | eugenol                                                                   | 0.38               |
| <b>26.55</b>             | <b>neryl acetate</b>                                                      | <b>1.32</b>        |
| 27.16                    | $\alpha$ -copaene                                                         | 0.64               |
| 28.36                    | Z- $\beta$ -caryophyllene                                                 | 0.05               |
| <b>29.05</b>             | <b><math>\beta</math>-caryophyllene</b>                                   | <b>28.28</b>       |
| 29.33                    | sesquiterpene                                                             | 0.10               |
| 29.96                    | vestitenone                                                               | 0.11               |
| 30.22                    | $\alpha$ -himachalene                                                     | 0.13               |
| <b>30.46</b>             | <b><math>\alpha</math>-caryophyllene</b>                                  | <b>3.92</b>        |
| 31.39                    | (4aS,9aR)-3.5.5.9-Tetramethyl-2.4a.5.6.7.9a-hexahydro-1H-benzo[7]annulene | 0.09               |
| 32.09                    | $\alpha$ -selinene                                                        | 0.05               |
| 32.26                    | $\beta$ -himachalene                                                      | 0.58               |
| 32.57                    | E,E- $\alpha$ -farnesene                                                  | 0.16               |
| 33.01                    | $\beta$ -cadinene                                                         | 0.22               |
| 33.13                    | calamene                                                                  | 0.12               |
| 33.23                    | $\gamma$ -dehydro-ar-himachalene                                          | 0.06               |
| 33.95                    | trans- $\alpha$ -bisabolene                                               | 0.05               |
| 34.20                    | sesquiterpene epoxide 1                                                   | 0.10               |
| 35.18                    | caryophyllen alcohol                                                      | 0.07               |
| <b>35.42</b>             | <b>epoxycaryophyllene</b>                                                 | <b>1.38</b>        |
| 36.17                    | longiborneol                                                              | 0.13               |
| 36.47                    | humulene 6.7-epoxide                                                      | 0.12               |

|              |                                                          |             |
|--------------|----------------------------------------------------------|-------------|
| 36.82        | sesquiterpene epoxide 2                                  | 0.18        |
| 37.20        | himachalol                                               | 0.10        |
| 37.35        | unknown                                                  | 0.15        |
| 37.50        | 10.10-dimethyl-2.6-dimethylenebicyclo[7.2.0]undecan-5-ol | 0.16        |
| 37.61        | unknown                                                  | 0.14        |
| 37.82        | unknown                                                  | 0.28        |
| 38.11        | sesquiterpene alcohol 1                                  | 0.23        |
| 38.20        | sesquiterpene alcohol 2                                  | 0.17        |
| 38.26        | unknown                                                  | 0.22        |
| 38.58        | allohimachalol                                           | 0.46        |
| 38.69        | atlantone isomer                                         | 0.42        |
| 38.75        | unknown                                                  | 0.62        |
| <b>39.40</b> | <b>Z-<math>\gamma</math>-atlantone</b>                   | <b>4.55</b> |
| <b>39.72</b> | <b>deodarone</b>                                         | <b>1.17</b> |
| <b>39.83</b> | <b>E-<math>\gamma</math>-atlantone</b>                   | <b>4.81</b> |
| <b>40.38</b> | <b>Z-<math>\alpha</math>-atlantone</b>                   | <b>1.43</b> |
| 41.04        | sesquiterpene alcohol 3                                  | 0.22        |
| 41.51        | $\alpha$ -bisabolol oxide A                              | 0.16        |
| 41.92        | sesquiterpene alcohol 4                                  | 0.10        |
| <b>42.48</b> | <b>E-<math>\alpha</math>-atlantone</b>                   | <b>7.30</b> |
| 42.61        | unknown                                                  | 0.22        |
| 44.59        | 6-dehydropetasol                                         | 0.14        |
| 45.04        | unknown                                                  | 0.10        |

<sup>1</sup> retention time (rt)

<sup>2</sup> Percentage of each compound according to the total chromatogram area.

**Table S3.** Essential oil composition of *Allium sativum* identified by GC-MS.

| rt (min) <sup>1</sup> | compound                                           | % TIC <sup>2</sup> |
|-----------------------|----------------------------------------------------|--------------------|
| <b>4.81</b>           | <b>diallyl sulfide</b>                             | <b>3.10</b>        |
| 5.63                  | (Z)-allyl(prop-1-en-1-yl)sulfane                   | 0.06               |
| 5.72                  | (E)-allyl(prop-1-en-1-yl)sulfane                   | 0.02               |
| 6.16                  | 3,4-dimethylthiophene                              | 0.05               |
| <b>6.61</b>           | <b>allyl methyl disulfide</b>                      | <b>2.92</b>        |
| 7.10                  | methyl cis-1-propenyl disulfide                    | 0.26               |
| 7.43                  | methyl trans-1-propenyl disulfide                  | 0.47               |
| 8.09                  | 3H-1,2-dithiole                                    | 0.03               |
| 8.66                  | dimethyl trisulfide                                | 0.97               |
| 12.07                 | ethyl 2-(methylthio)acetate                        | 0.02               |
| 13.04                 | 1-(butylsulfanyl)-1-propene                        | 0.03               |
| <b>13.75</b>          | <b>diallyl disulfide</b>                           | <b>15.97</b>       |
| <b>14.35</b>          | <b>Z-1-propenyl 2-propenyl disulfide</b>           | <b>3.01</b>        |
| <b>14.67</b>          | <b>E-1-propenyl 2-propenyl disulfide</b>           | <b>5.44</b>        |
| <b>16.45</b>          | <b>allyl methyl trisulfide</b>                     | <b>14.06</b>       |
| 17.15                 | 4-methyl-1,2,3-trithiolane                         | 0.07               |
| 17.39                 | methyl cis-1-propenyl trisulfide                   | 0.06               |
| 17.65                 | methyl trans-1-propenyl trisulfide                 | 0.10               |
| 18.74                 | 3-vinyl-1,2-dithi-4-ene                            | 0.13               |
| 19.96                 | 3-vinyl-1,2-dithiacyclohex-5-ene                   | 0.72               |
| 23.26                 | sec-butyl-(Z)-propenyl-disulfide                   | 0.25               |
| 23.58                 | (methylthio)dimethyl sulfoxide                     | 0.17               |
| <b>24.08</b>          | <b>diallyl trisulfide</b>                          | <b>39.93</b>       |
| 24.50                 | 2-propenyl propyl trisulfide                       | 0.20               |
| 24.82                 | allyl (Z)-prop-1-enyl trisulfide                   | 0.14               |
| 25.06                 | allyl (E)-prop-1-enyl trisulfide                   | 0.28               |
| 26.75                 | 5-methyl-1,2,3,4-tetrathiane                       | 0.13               |
| <b>27.32</b>          | <b>sulphur compound</b>                            | <b>2.42</b>        |
| 31.01                 | unknown                                            | 0.09               |
| 31.20                 | unknown                                            | 0.07               |
| 33.26                 | 2,4,5,7-tetrathiaoctane                            | 0.06               |
| <b>33.90</b>          | <b>diallyl tetrasulfide</b>                        | <b>7.41</b>        |
| 34.27                 | 1-(1-(prop-1-en-1-ylthio)propyl)-2-propyldisulfane | 0.11               |
| 41.90                 | sulphur compound                                   | 0.29               |
| 43.75                 | 1-allyl-3-(2-(allylthio)propyl)trisulfane          | 0.21               |
| 44.36                 | sulphur compound                                   | 0.35               |
| 46.11                 | sulphur compound                                   | 0.26               |
| 47.10                 | sulphur compound                                   | 0.17               |

<sup>1</sup> retention time (rt)<sup>2</sup> Percentage of each compound according to the total chromatogram area.

**Table S4.** Essential oil composition of *Rosmarinus officinallis* identified by GC-MS.

| rt (min) <sup>1</sup> | compound                                | % TIC <sup>2</sup> |
|-----------------------|-----------------------------------------|--------------------|
| 6.75                  | tricyclene                              | 0.17               |
| 6.88                  | 2-thujene                               | 0.32               |
| <b>7.18</b>           | <b><math>\alpha</math>-pinene</b>       | <b>10.92</b>       |
| <b>7.83</b>           | <b>camphene</b>                         | <b>4.38</b>        |
| 7.97                  | dehydrosabinene                         | 0.04               |
| 8.77                  | sabinene                                | 0.12               |
| <b>8.98</b>           | <b><math>\beta</math>-pinene</b>        | <b>7.31</b>        |
| 9.08                  | 1-octen-3-ol                            | 0.13               |
| 9.31                  | 3-octanone                              | 0.13               |
| <b>9.50</b>           | <b><math>\beta</math>-myrcene</b>       | <b>1.32</b>        |
| 9.83                  | 3-octanol                               | 0.01               |
| 10.11                 | pseudolimonene                          | 0.02               |
| 10.22                 | $\alpha$ -phellandrene                  | 0.12               |
| 10.32                 | 3-carene                                | 0.19               |
| 10.71                 | $\alpha$ -terpinene                     | 0.24               |
| <b>11.07</b>          | <b>p-cymene</b>                         | <b>2.54</b>        |
| <b>11.29</b>          | <b>limonene</b>                         | <b>3.50</b>        |
| <b>11.49</b>          | <b>eucalyptol</b>                       | <b>42.79</b>       |
| 11.63                 | Z- $\beta$ -ocimene                     | 0.03               |
| 12.11                 | E- $\beta$ -ocimene                     | 0.04               |
| 12.63                 | $\gamma$ -terpinene                     | 0.41               |
| 13.19                 | sabinene hydrate                        | 0.07               |
| 13.89                 | terpinolene                             | 0.24               |
| 14.64                 | linalool                                | 0.65               |
| 15.49                 | fenchol                                 | 0.03               |
| 15.59                 | chrysanthenone                          | 0.01               |
| 15.74                 | cis-p-menth-2-en-1-ol                   | 0.02               |
| 15.85                 | $\alpha$ -campholenal                   | 0.01               |
| 16.47                 | E-pinocarveol                           | 0.02               |
| <b>16.82</b>          | <b>camphor</b>                          | <b>11.53</b>       |
| <b>17.99</b>          | <b>endo-borneol</b>                     | <b>3.25</b>        |
| 18.39                 | 4-terpineol                             | 0.72               |
| 18.70                 | p-cymen-8-ol                            | 0.02               |
| <b>19.09</b>          | <b><math>\alpha</math>-terpineol</b>    | <b>1.71</b>        |
| 19.58                 | verbenone                               | 0.13               |
| 22.70                 | E-ascaridol glycol                      | 0.02               |
| <b>23.17</b>          | <b>bornyl acetate</b>                   | <b>1.03</b>        |
| 24.79                 | unknown                                 | 0.03               |
| 25.90                 | $\alpha$ -cubebene                      | 0.04               |
| 26.83                 | $\alpha$ -ylangene                      | 0.05               |
| 27.11                 | $\alpha$ -copaene                       | 0.18               |
| <b>28.94</b>          | <b><math>\beta</math>-caryophyllene</b> | <b>4.48</b>        |
| 29.36                 | $\beta$ -copaene                        | 0.04               |
| 29.69                 | alloaromadendrene                       | 0.03               |
| 30.41                 | $\alpha$ -caryophyllene                 | 0.38               |
| 31.24                 | $\gamma$ -muurolene                     | 0.11               |
| 32.20                 | cadinadiene                             | 0.03               |
| 32.63                 | $\beta$ -bisabolene                     | 0.03               |
| 32.76                 | $\gamma$ -cadinene                      | 0.06               |
| 32.98                 | $\beta$ -cadinene                       | 0.15               |
| 35.38                 | epoxycaryophyllene                      | 0.21               |

<sup>1</sup> retention time (rt)<sup>2</sup> Percentage of each compound according to the total chromatogram area.

**Table S5.** *Essential oil composition of Tagetes minuta identified by GC-MS.*

| rt (min) <sup>1</sup> | compound                                                                                            | % TIC <sup>2</sup> |
|-----------------------|-----------------------------------------------------------------------------------------------------|--------------------|
| 7.07                  | $\alpha$ -pinene                                                                                    | 0.06               |
| 7.51                  | propyl 2-methylbutyrate                                                                             | 0.08               |
| 7.72                  | camphene                                                                                            | 0.08               |
| 8.65                  | sabinene                                                                                            | 0.33               |
| 8.84                  | $\beta$ -pinene                                                                                     | 0.05               |
| 10.92                 | p-cymene                                                                                            | 0.08               |
| <b>11.13</b>          | <b>limonene</b>                                                                                     | <b>5.26</b>        |
| <b>11.50</b>          | <b>Z-<math>\beta</math>-ocimene</b>                                                                 | <b>41.95</b>       |
| 11.97                 | E- $\beta$ -ocimene                                                                                 | 0.28               |
| <b>12.23</b>          | <b>2,6-Dimethyloct-7-en-4-one (dihydrotagetone)</b>                                                 | <b>21.15</b>       |
| 13.12                 | 1-octanol                                                                                           | 0.07               |
| 13.28                 | $\alpha$ -pinene epoxide                                                                            | 0.37               |
| 14.11                 | 3-methyl-2-(2-methyl-2-butenyl)-furan (rosefuran)                                                   | 0.07               |
| 14.29                 | monoterpene epoxide                                                                                 | 0.16               |
| 14.49                 | linalool                                                                                            | 0.08               |
| 15.12                 | allyl (2E)-2-methyl-2-butenolate                                                                    | 0.11               |
| 15.83                 | (4E,6Z)-2,6-dimethyl-2,4,6-octatriene (neo-alloocimene)                                             | 0.60               |
| 15.91                 | E- $\beta$ -ocimene epoxide (myroxide)                                                              | 0.40               |
| 16.37                 | (E,E)-2,6-dimethyl-2,4,6-octatriene (E,E-alloocimene)                                               | 0.39               |
| 16.65                 | (5E)-2,6-dimethyl-5,7-octadien-4-one (E-tagetone)                                                   | 0.22               |
| <b>16.96</b>          | <b>(5Z)-2,6-dimethyl-5,7-octadien-4-one (Z-tagetone)</b>                                            | <b>1.07</b>        |
| 17.80                 | rosefuran epoxide                                                                                   | 0.10               |
| 18.76                 | methyl salicylate                                                                                   | 0.29               |
| 19.33                 | 2,6-dimethylocta-3,5,7-trien-2-ol isomer                                                            | 0.15               |
| 19.65                 | 2,6-dimethylocta-3,5,7-trien-2-ol isomer                                                            | 0.17               |
| 19.80                 | octyl acetate                                                                                       | 0.16               |
| 20.65                 | (Z)-2,6-dimethylocta-2,5,7-trien-4-one (Z-tagetenone)                                               | 0.16               |
| 21.62                 | unknown                                                                                             | 0.33               |
| 21.86                 | 1,4,4-trimethyl-8-oxabicyclo[5.1.0]oct-5-en-2-ol                                                    | 0.11               |
| <b>22.31</b>          | <b>carvone</b>                                                                                      | <b>1.25</b>        |
| 22.39                 | unknown                                                                                             | 0.53               |
| 24.62                 | (E,E)-2,4-decadienal                                                                                | 0.22               |
| 25.36                 | piperitenone                                                                                        | 0.25               |
| 25.62                 | 7-epi-silphiperfol-5-ene                                                                            | 0.14               |
| 26.86                 | unknown                                                                                             | 0.15               |
| 27.26                 | modhephene                                                                                          | 0.42               |
| 28.85                 | $\beta$ -caryophyllene                                                                              | 0.51               |
| 30.34                 | $\alpha$ -caryophyllene                                                                             | 0.19               |
| 35.13                 | spathulenol                                                                                         | 0.73               |
| 35.31                 | epoxycaryophyllene                                                                                  | 0.16               |
| 42.70                 | unknown                                                                                             | 0.24               |
| 46.69                 | unknown                                                                                             | 0.74               |
| 47.43                 | ethyl palmitate                                                                                     | 0.44               |
| 47.56                 | 2-methyl-6-(4-methyl-5-(3-methylbut-2-en-1-yl)cyclohex-3-en-1-yl)hepta-2,5-dien-4-one isomer        | 0.86               |
| <b>47.93</b>          | <b>2-methyl-6-(4-methyl-5-(3-methylbut-2-en-1-yl)cyclohex-3-en-1-yl)hepta-2,5-dien-4-one isomer</b> | <b>1.55</b>        |
| 48.09                 | unknown                                                                                             | 0.48               |
| <b>48.38</b>          | <b>2,6-ditert-butyl-4-methylphenyl 2-methylcyclopropanecarboxylate</b>                              | <b>2.15</b>        |
| <b>48.44</b>          | <b>(Z)-2-methyl-6-(4-methyl-5-(3-methylbut-2-en-1-yl)cyclohex-3-en-1-yl)hepta-2,5-dien-4-one</b>    | <b>1.29</b>        |



|              |                       |             |
|--------------|-----------------------|-------------|
| 48.51        | C20H28O2              | 0.95        |
| <b>48.79</b> | <b>unknown</b>        | <b>1.38</b> |
| <b>48.81</b> | <b>ethyl linolate</b> | <b>2.06</b> |
| <b>48.86</b> | <b>ethyl oleate</b>   | <b>1.45</b> |
| <b>49.04</b> | <b>unknown</b>        | <b>6.92</b> |
| 49.14        | unknown               | 0.59        |

<sup>1</sup> retention time (rt)

<sup>2</sup> Percentage of each compound according to the total chromatogram area.

**Table S6.** Essential oil composition of *Thymus zygis* identified by GC-MS.

| rt (min) <sup>1</sup> | compound                                 | % TIC <sup>2</sup> |
|-----------------------|------------------------------------------|--------------------|
| 6.77                  | 5.5-dimethyl-1-vinylbicyclo[2.1.1]hexane | 0.26               |
| 6.85                  | tricyclene                               | 0.06               |
| 6.98                  | 2-thujene                                | 0.20               |
| <b>7.26</b>           | <b><math>\alpha</math>-pinene</b>        | <b>3.82</b>        |
| 7.90                  | camphene                                 | 0.76               |
| 8.85                  | sabinene                                 | 0.70               |
| 9.04                  | $\beta$ -pinene                          | 0.30               |
| 9.16                  | 1-octen-3-ol                             | 0.06               |
| 9.39                  | 3-octanone                               | 0.09               |
| <b>9.59</b>           | <b><math>\beta</math>-myrcene</b>        | <b>4.69</b>        |
| 9.91                  | 3-octanol                                | 0.06               |
| 10.30                 | $\alpha$ -phellandrene                   | 0.30               |
| <b>10.79</b>          | <b><math>\alpha</math>-terpinene</b>     | <b>2.10</b>        |
| <b>11.15</b>          | <b>p-cymene</b>                          | <b>4.52</b>        |
| <b>11.35</b>          | <b>limonene</b>                          | <b>3.63</b>        |
| 11.40                 | $\beta$ -phellandrene                    | 0.47               |
| 11.48                 | eucalyptol                               | 0.13               |
| 12.17                 | E- $\beta$ -ocimene                      | 0.02               |
| <b>12.70</b>          | <b><math>\gamma</math>-terpinene</b>     | <b>4.28</b>        |
| <b>13.27</b>          | <b>sabinene hydrate</b>                  | <b>1.87</b>        |
| 13.96                 | terpinolene                              | 0.88               |
| 14.05                 | linalool oxide                           | 0.34               |
| 14.18                 | dimethylstyrene                          | 0.05               |
| <b>14.89</b>          | <b>linalool</b>                          | <b>48.36</b>       |
| 14.95                 | hotrienol                                | 0.79               |
| 15.82                 | cis-p-menth-2-en-1-ol                    | 0.46               |
| 16.54                 | E-pinocarveol                            | 0.03               |
| 16.66                 | E-p-Menth-2-en-1-ol                      | 0.33               |
| 16.84                 | camphor                                  | 0.29               |
| 17.34                 | 2.6-dimethyl-1.5.7-octatrien-3-ol        | 0.05               |
| <b>18.04</b>          | <b>endo-borneol</b>                      | <b>2.10</b>        |
| 18.25                 | trans-pyranoid linalool oxide            | 0.08               |
| <b>18.50</b>          | <b>4-terpineol</b>                       | <b>11.09</b>       |
| 18.77                 | p-cymen-8-ol                             | 0.14               |
| <b>19.15</b>          | <b><math>\alpha</math>-terpineol</b>     | <b>1.81</b>        |
| 19.26                 | dihydrocarvone                           | 0.19               |
| 19.55                 | E-dihydrocarvone                         | 0.19               |
| 19.79                 | E-piperitol                              | 0.17               |
| 20.24                 | E-carveol                                | 0.07               |
| 20.51                 | nerol                                    | 0.05               |
| 20.65                 | bornyl formate                           | 0.20               |
| 21.16                 | 2-Isopropyl-1-methoxy-4-methylbenzene    | 0.12               |
| 21.35                 | carvone                                  | 0.04               |
| <b>21.73</b>          | <b>linalyl acetate</b>                   | <b>1.11</b>        |
| 22.47                 | p-mentha-1.8-dien-3-one                  | 0.08               |
| 22.75                 | 1.4-dihydroxy-p-menth-2-ene              | 0.11               |
| 23.21                 | bornyl acetate                           | 0.14               |
| 23.52                 | Carvacrol                                | 0.70               |
| 23.85                 | thymol                                   | 0.10               |

|              |                                         |             |
|--------------|-----------------------------------------|-------------|
| 24.84        | unknown                                 | 0.08        |
| 27.48        | $\beta$ -bourbonene                     | 0.05        |
| <b>28.97</b> | <b><math>\beta</math>-caryophyllene</b> | <b>1.06</b> |
| 32.06        | elixene                                 | 0.06        |
| 33           | cadinene isomer                         | 0.05        |
| 35.21        | spathunelol                             | 0.10        |
| 35.40        | epoxycaryophyllene                      | 0.19        |

<sup>1</sup> retention time (rt)

<sup>2</sup> Percentage of each compound according to the total chromatogram area.

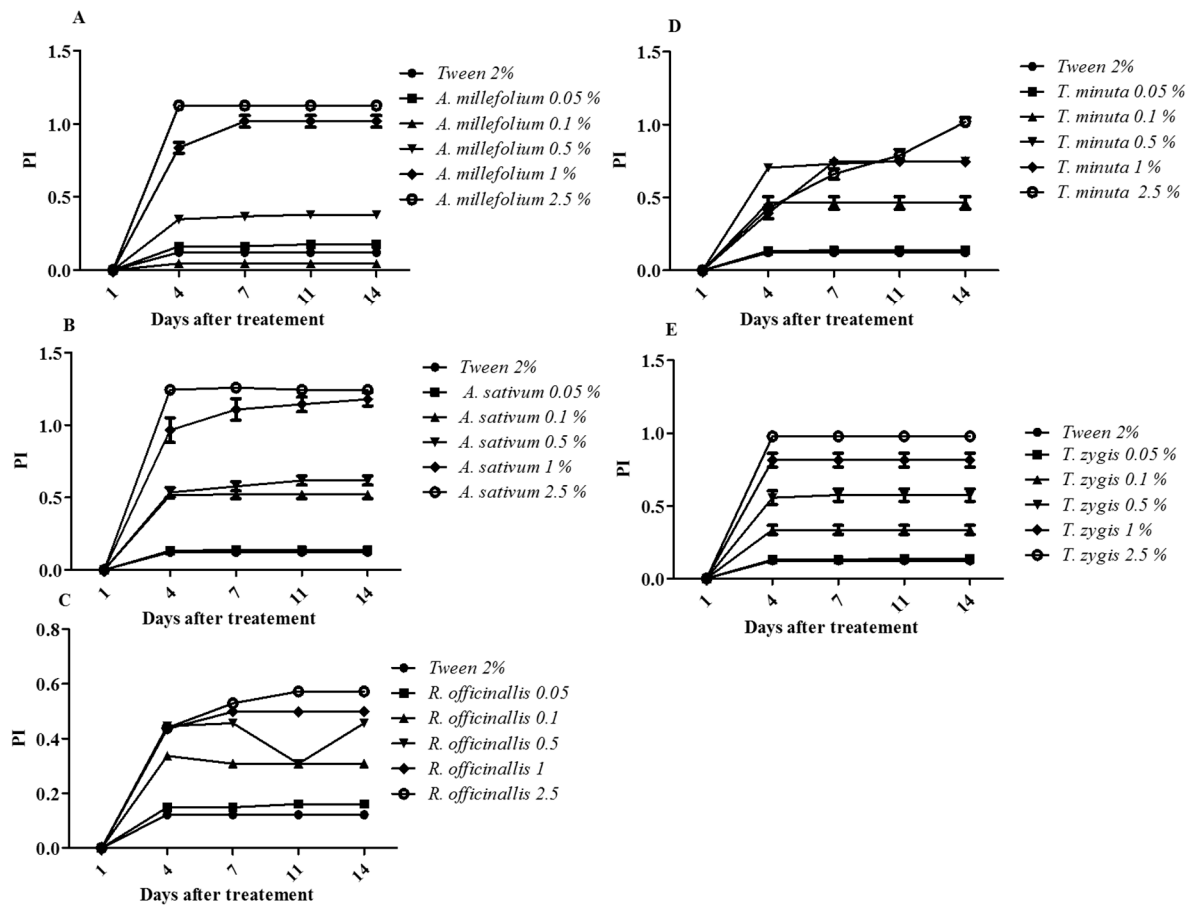

**Figure S1.** The phytotoxicity index (mean  $\pm$  SE) of the essential oils of *Achillea millefolium* (A), *Allium sativum* (B), *Rosmarinus officinalis* (C), *Tagetes minuta* (D), and *Thymus zygis* (E) on tomato growth after 14 days of treatment and compared to the control (Tween 2%).
